# Supplementary material
Source: Springer Nature journal article supplement (https://www.springermedizin.de/resource/supplementary/13012_2012_522_MOESM4_ESM.pdf/9630220)
Supplement: MOESM4 [file 9630220]

#### Additional File 4.

#### Performance of the PAP Model across the five behaviours.

|                                                                             |                                                                                                                                                                                                                                                                                                                                                                                                                                                   |
|-----------------------------------------------------------------------------|---------------------------------------------------------------------------------------------------------------------------------------------------------------------------------------------------------------------------------------------------------------------------------------------------------------------------------------------------------------------------------------------------------------------------------------------------|
| Taking Dental Radiographs                                                   | Groups at different stages did not differ in the number of radiographs actually taken ( $F(5, 162) = 0.76, p = 0.578$ ), behavioural simulation score ( $F(6, 207) = 2.26, p < .05$ ) or intention ( $F(6, 206) = 2.03, p = 0.063$ ).                                                                                                                                                                                                             |
| Performing Dental Restorations                                              | The PAP model did not predict the number of restorations performed ( $F(2, 111) = 0.66, p = 0.521$ ); it did predict both behavioural simulation score ( $F(4, 123) = 3.585, p = 0.008$ , adjusted $R^2 = 0.073$ ) and intention ( $F(4, 122) = 5.637, p < 0.001$ , adjusted $R^2 = 0.130$ ).                                                                                                                                                     |
| Placing Fissure Sealants                                                    | The PAP model did not predict the decision to place a fissure sealant in the behavioural scenarios ( $F(3, 116) = 0.90, p = 0.44$ ) but did predict intention to place a fissure sealant ( $F(3, 119) = 5.66, p = 0.001$ ).                                                                                                                                                                                                                       |
| Managing Upper Respiratory Tract Infections without prescribing antibiotics | GPs who endorsed that they had 'already changed my management of URTIs to try to avoid the use of antibiotics' issued a mean (95%CI) of 11.8 ( 21.1 to 2.5 , $p = 0.014$ ) fewer prescriptions than GPs who endorsed any other response. Similarly for scenario scores these GPs made a mean (95%CI) of 1.0 ( 1.2 to -0.7, $p < 0.001$ ) fewer decision to prescribe and their intention scores were significantly more positive ( $p < 0.001$ ). |
| Managing Low Back Pain without ordering Lumbar Spine X-rays                 | Comparing GPs who endorsed 'I have decided that I will request less lumbar X-rays I request' or 'I have already done something about decreasing the number of lumbar X-rays I request' the stage model did not predict behaviour or behavioural simulation but did predict intention ( $p < 0.001$ ).                                                                                                                                             |
